# Supplementary material for: Thermal acclimation of tropical coral reef fishes to global heat waves
Source: eLife. 2021 Jan 26;10:e59162. doi: 10.7554/eLife.59162 (PMC7837695; doi:10.7554/eLife.59162)
Supplement: Supplementary file 2. [file elife-59162-supp2.xlsx]

## Sheet: Model Mass Adjusted Means
			mean	SEM	lower confidence limit	upper confidence limit		Fulisers	Mass adjusted means			mean	SEM	lower conf limit	upper conf limit						mean	SEM	lower conf limit	upper conf limit
apogonid	as	control	310.296	26.0492	261.34	363.453			bloodhb	control		7.50133	1.60789	4.98498	11.2879			apogonids	body condition	control	1.92084	0.300309	1.42039	2.5976
apogonid	as	Ht wk 0	596.378	41.3879	518.016	680.257				ht wk0		8.73971	1.73809	5.97352	12.7868					ht wk 0	2.24382	0.568276	1.39124	3.61888
apogonid	as	Ht wk 1	595.733	51.8529	498.436	701.699				ht wk1		9.25963	1.97621	6.16375	13.9105					ht wk 1	2.06469	0.464172	1.34647	3.16602
apogonid	as	Ht wk 2	485.993	50.4298	392.176	589.861				ht wk2		8.91429	1.78017	6.08368	13.0619					ht wk 2	2.05377	0.460561	1.3407	3.1461
apogonid	as	Ht wk 3	268.409	37.855	199.34	347.732				ht wk3		9.17128	1.83727	6.25186	13.454					ht wk 3	2.26344	0.506088	1.47932	3.46318
apogonid	as	Ht wk 4	311.863	52.3931	217.626	423.006				ht wk4		9.21548	1.84201	6.28712	13.5078					ht wk 4	2.01002	0.447161	1.31636	3.06923
apogonid	mmr	control	496.299	32.9441	433.828	562.969				ht wk5		8.09862	1.8883	5.20317	12.6053					ht wk 5	2.25133	0.583401	1.38161	3.66854
apogonid	mmr	Ht wk 0	852.849	49.4935	758.6	952.614			body conditio	control		3.17112	0.634279	2.16291	4.64929				gill cs	control	46.9801	7.57893	34.4179	64.1273
apogonid	mmr	Ht wk 1	789.669	54.2811	686.862	899.644				ht wk0		2.60335	0.517736	1.77937	3.80889					ht wk 0	63.6156	14.9376	40.7517	99.3073
apogonid	mmr	Ht wk 2	695.383	57.0262	588.103	811.645				ht wk1		2.9549	0.587362	2.02001	4.32247					ht wk 1	51.9957	12.5197	32.9566	82.0337
apogonid	mmr	Ht wk 3	357.948	43.7154	277.393	448.758				ht wk2		2.44248	0.487759	1.6669	3.57892					ht wk 2	45.104	10.1146	29.4439	69.0933
apogonid	mmr	Ht wk 4	429.166	51.6253	333.945	536.316				ht wk3		2.48791	0.498399	1.69595	3.64968					ht wk 3	62.828	15.1057	39.8474	99.0618
apogonid	smr	control	178.023	19.7308	141.451	218.795				ht wk4		2.5695	0.513597	1.753	3.7663					ht wk 4	45.8308	10.1958	30.0144	69.9817
apogonid	smr	Ht wk 0	236.79	26.0792	188.433	290.664				ht wk5		2.54803	0.50827	1.73964	3.73206					ht wk 5	36.347	9.4188	22.3056	59.2273
apogonid	smr	Ht wk 1	181.816	28.646	130.005	242.297			gill cs	control		105.569	21.1156	72.0048	154.778				gill ldh	control	322.216	50.3762	238.268	435.742
apogonid	smr	Ht wk 2	176.313	30.3748	121.804	240.873				ht wk0		92.2176	18.3396	63.03	134.921					ht wk 0	323.633	75.9927	207.317	505.209
apogonid	smr	Ht wk 3	83.6147	21.1284	47.3306	130.154				ht wk1		113.17	22.4955	77.3648	165.547					ht wk 1	462.564	103.991	301.657	709.301
apogonid	smr	Ht wk 4	135.581	34.5455	76.325	211.743				ht wk2		83.0822	16.5913	56.7005	121.739					ht wk 2	312.067	69.9815	203.717	478.044
fusilers	as	control	315.212	37.1335	246.632	392.195				ht wk3		66.5836	14.3379	44.1688	100.373					ht wk 3	251.704	60.5173	159.638	396.866
fusilers	as	Ht wk 0	356.303	37.9796	285.751	434.631				ht wk4		38.078	7.61111	25.9781	55.8137					ht wk 4	371.595	82.667	243.356	567.41
fusilers	as	Ht wk 1	362.941	40.7869	287.4	447.285				ht wk5		96.555	19.2604	65.922	141.423					ht wk 5	321.502	83.3126	197.301	523.886
fusilers	as	Ht wk 2	420.035	42.6692	340.566	507.829			gill ldh	control		274.986	55.0019	187.558	403.166				muscl cs	control	115.587	18.6773	84.6379	157.853
fusilers	as	Ht wk 3	450.105	42.7004	370.303	537.688				ht wk0		200.199	46.1333	129.251	310.093					ht wk 0	113.179	26.5757	72.5017	176.678
fusilers	as	Ht wk 4	395.685	45.1247	312.183	489.071				ht wk1		196.622	41.9718	130.873	295.402					ht wk 1	173.147	38.9259	112.916	265.506
fusilers	as	Ht wk 5	336.115	39.1579	263.747	417.246				ht wk2		348.211	74.1263	232.018	522.593					ht wk 2	143.719	34.6441	91.0498	226.855
fusilers	mmr	control	514.061	47.4211	425.317	611.207				ht wk3		317.597	67.9021	211.267	477.443					ht wk 3	192.972	43.1472	126.121	295.258
fusilers	mmr	Ht wk 0	663.534	51.8289	565.837	769.007				ht wk4		189.382	44.0893	121.751	294.581					ht wk 4	249.298	55.4603	163.265	380.669
fusilers	mmr	Ht wk 1	614.358	53.0657	514.751	722.769				ht wk5		236.354	47.1469	161.368	346.184					ht wk 5	200.32	51.9101	122.934	326.421
fusilers	mmr	Ht wk 2	638.201	52.5958	539.277	745.452			glucose	control		1.93214	0.414148	1.284	2.90746				muscle ldh	control	410.159	64.1253	303.298	554.669
fusilers	mmr	Ht wk 3	690.164	52.875	590.42	797.69				ht wk0		2.12771	0.613082	1.24194	3.64523					ht wk 0	470.211	113.91	297.261	743.786
fusilers	mmr	Ht wk 4	623.537	56.6462	517.453	739.507				ht wk1		4.65279	0.993007	3.09716	6.98975					ht wk 1	580.222	130.442	378.386	889.72
fusilers	mmr	Ht wk 5	568.373	50.9204	472.95	672.558				ht wk2		3.59807	0.718527	2.45555	5.27218					ht wk 2	382.169	85.702	249.479	585.431
fusilers	smr	control	195.463	29.2413	142.351	256.977				ht wk3		3.01112	0.603215	2.05262	4.41722					ht wk 3	757.27	169.32	494.93	1158.67
fusilers	smr	Ht wk 0	300.207	34.8619	235.766	372.425				ht wk4		3.5636	0.712299	2.43121	5.22342					ht wk 4	455.627	101.361	298.388	695.725
fusilers	smr	Ht wk 1	241.72	33.2859	180.882	311.363				ht wk5		2.3895	0.512233	1.58787	3.59582					ht wk 5	202.253	52.4109	124.12	329.57
fusilers	smr	Ht wk 2	213.852	30.4458	158.341	277.688			hcrt	control		34.29	7.34995	22.7873	51.5991				spleen	control	3.72441	0.582283	2.75407	5.03662
fusilers	smr	Ht wk 3	235.361	30.8775	178.731	299.771				ht wk0		39.2392	7.80362	26.8196	57.4098					ht wk 0	3.73572	0.877188	2.39308	5.83165
fusilers	smr	Ht wk 4	215.563	33.3063	155.225	285.786				ht wk1		39.157	9.06787	25.2287	60.7748					ht wk 1	3.9208	0.88145	2.55691	6.0122
fusilers	smr	Ht wk 5	224.57	32.0075	166.217	291.686				ht wk2		38.1119	7.61087	26.01	55.8446					ht wk 2	5.46045	1.22451	3.56458	8.36468
										ht wk3		37.0273	7.41764	25.2407	54.3179					ht wk 3	4.22201	1.01486	2.67799	6.65625
										ht wk4		34.7451	6.94491	23.7043	50.9284					ht wk 4	3.59001	0.798653	2.35108	5.4818
										ht wk5		28.1601	6.56591	18.0922	43.8306					ht wk 5	3.44384	1.11587	1.89253	6.26675
									lactate	control		0.700967	0.15025	0.465825	1.0548				ssi	control	0.46452	0.0726243	0.343497	0.628184
										ht wk0		0.878176	0.174646	0.600226	1.28484					ht wk 0	0.464722	0.109122	0.297698	0.725456
										ht wk1		0.910084	0.194232	0.605805	1.36719					ht wk 1	0.676667	0.152124	0.441282	1.03761
										ht wk2		0.801469	0.160052	0.546973	1.17438					ht wk 2	0.433028	0.0971072	0.28268	0.66334
										ht wk3		0.80738	0.173762	0.535699	1.21684					ht wk 3	0.189503	0.0423716	0.123854	0.28995
										ht wk4		0.79317	0.15854	0.541128	1.16261					ht wk 4	0.167049	0.0371626	0.1094	0.255077
										ht wk5		0.813405	0.174368	0.540524	1.22405					ht wk 5	0.0971136	0.0251656	0.0595972	0.158246
									mchc	control		3.48598	0.747208	2.31659	5.24565
										ht wk0		3.49517	0.695096	2.38892	5.1137
										ht wk1		3.7628	0.871379	2.42436	5.84017
										ht wk2		3.77243	0.753347	2.57455	5.52767
										ht wk3		3.94221	0.789739	2.68732	5.7831
										ht wk4		4.16841	0.833189	2.84383	6.10993
										ht wk5		4.56942	1.06542	2.93574	7.11219
									muscle cs	control		210.089	42.0214	143.294	308.018
										ht wk0		214.222	42.603	146.419	313.423
										ht wk1		249.295	49.5538	170.422	364.673
										ht wk2		197.735	39.4873	134.947	289.737
										ht wk3		184.198	36.9003	125.564	270.213
										ht wk4		104.013	20.7903	70.9611	152.459
										ht wk5		174.633	34.8351	119.229	255.782
									muscle ldh	control		1.36392	0.272807	0.930281	1.99969
										ht wk0		0.605532	0.120424	0.413876	0.885938
										ht wk1		1.12151	0.239142	0.7468	1.68424
										ht wk2		0.816399	0.175224	0.542257	1.22914
										ht wk3		1.8293	0.393221	1.21432	2.75575
										ht wk4		1.59367	0.318546	1.08726	2.33596
										ht wk5		1.5054	0.300292	1.0278	2.20494
									spleen	control		5.54864	1.10983	3.78454	8.13505
										ht wk0		4.71636	0.937958	3.22359	6.90039
										ht wk1		6.14206	1.31131	4.08796	9.22829
										ht wk2		6.21629	1.24138	4.24239	9.10861
										ht wk3		7.9263	1.58787	5.40319	11.6276
										ht wk4		8.44266	1.68754	5.75988	12.375
										ht wk5		10.1551	2.17535	6.75015	15.2775
									ssi	control		0.107312	0.0214642	0.0731935	0.157333
										ht wk0		0.112914	0.0224556	0.0771758	0.165202
										ht wk1		0.101358	0.0201474	0.0692897	0.148268
										ht wk2		0.106679	0.0228853	0.0708704	0.160581
										ht wk3		0.0960195	0.0192355	0.0654544	0.140857
										ht wk4		0.112446	0.0224759	0.0767145	0.16482
										ht wk5		0.124937	0.0249219	0.0852992	0.182993

## Sheet: Gill model Adjusted means
Fusiliers		By individual										Apogonids		By individual
Trmt	Measurement	mean	se	N	lsmean	SE	lsmean_backcalc	se_high	se_low			Trmt	Measurement	mean	se	N	lsmean	SE	lsmean_backcalc	se_high	se_low
Control	Ep.thick	0.844979	0.0179057	12	1.02776	0.00424119	0.83565	0.858616	0.81339			Control	Ep.thick	0.79325	0.0394816	7	1.02382	0.00305914	0.774095	0.799711	0.749373
Control	Lam.per	165.642	6.07452	10	0.464175	0.00126034	153.226	155.982	150.526			Control	Lam.per	183.412	12.381	6	0.625089	0.001444	165.947	170.176	161.834
Control	Width	6.84594	0.065979	10	0.747349	0.00126034	6.74864	6.82374	6.6745			Control	Width	6.49559	0.537496	6	0.836286	0.00144864	6.9938	7.12697	6.86335
HT wk 0	Ep.thick	0.76455	0.0341297	8	1.04125	0.00468432	0.767201	0.790219	0.744952			HT wk 0	Ep.thick	0.83632	0.0372334	5	1.01742	0.00451532	0.828744	0.869832	0.789766
HT wk 0	Lam.per	176.349	11.5262	8	0.462392	0.00138202	157.142	160.256	154.097			HT wk 0	Lam.per	197.147	16.199	5	0.620562	0.00172594	179.602	185.127	174.257
HT wk 0	Width	6.82723	0.163477	8	0.748364	0.00139466	6.68887	6.77117	6.60771			HT wk 0	Width	6.6333	0.423091	5	0.836935	0.0017312	6.93499	7.09299	6.78083
HT wk 1	Ep.thick	0.806543	0.0274348	7	1.03542	0.0055126	0.795978	0.82433	0.768744			HT wk 1	Ep.thick	0.74448	0.0499405	5	1.03026	0.00451532	0.723039	0.758428	0.689446
HT wk 1	Lam.per	161.014	7.14222	5	0.461911	0.00222419	158.217	163.304	153.312			HT wk 1	Lam.per	191.917	13.3414	5	0.625032	0.00165389	166.113	170.971	161.406
HT wk 1	Width	7.47336	0.488315	5	0.735567	0.0022928	7.48966	7.64454	7.33839			HT wk 1	Width	6.32786	0.47543	5	0.83994	0.00165622	6.66978	6.81455	6.52836
HT wk 2	Ep.thick	0.969	0.060518	5	1.01133	0.00695646	0.928799	0.971796	0.88798			HT wk 2	Ep.thick	0.703086	0.0142477	7	1.03464	0.00381614	0.690437	0.718758	0.66333
HT wk 2	Lam.per	175.184	10.2743	5	0.461584	0.00182882	158.954	163.146	154.886			HT wk 2	Lam.per	212.38	30.2494	6	0.640418	0.00207805	127.498	132.087	123.083
HT wk 2	Width	7.79247	0.19105	5	0.734283	0.00184733	7.57594	7.7021	7.45216			HT wk 2	Width	5.95438	0.308556	6	0.840613	0.0020715	6.61195	6.79183	6.43725
HT wk 3	Ep.thick	0.85695	0.0228152	8	1.02346	0.00492035	0.858955	0.886527	0.832366			HT wk 4	Ep.thick	0.784257	0.0240391	7	1.02374	0.00381614	0.774731	0.806856	0.743997
HT wk 3	Lam.per	200.376	8.6681	5	0.447651	0.00172705	194.331	199.319	189.486			HT wk 4	Lam.per	200.864	9.60892	4	0.615643	0.0019801	195.847	202.832	189.123
HT wk 3	Width	7.94639	0.140094	5	0.731608	0.00174355	7.75944	7.88178	7.63928			HT wk 4	Width	7.36281	0.461915	4	0.833079	0.00198403	7.29229	7.48393	7.10599
HT wk 4	Ep.thick	0.781871	0.0369438	7	1.04081	0.00554719	0.769308	0.796739	0.742959			HT wk 5	Ep.thick	0.726267	0.0322249	6	1.0326	0.0041219	0.70538	0.736751	0.675462
HT wk 4	Lam.per	183.455	7.70392	5	0.455236	0.00193605	174.061	178.993	169.285			HT wk 5	Lam.per	200.975	10.0813	5	0.617276	0.00149032	190.284	195.355	185.357
HT wk 4	Width	7.27241	0.0906977	5	0.741141	0.00193605	7.12798	7.25127	7.0071			HT wk 5	Width	6.8985	0.504092	5	0.842557	0.00149907	6.44783	6.57397	6.32434
HT wk 5	Ep.thick	0.857267	0.0221566	6	1.02511	0.00595429	0.849951	0.883041	0.818282
HT wk 5	Lam.per	167.826	10.0161	6	0.460144	0.001663	162.244	166.142	158.452
HT wk 5	Width	6.98262	0.0964765	6	0.745927	0.00166211	6.83347	6.93414	6.73447			Trmt	Measurement	mean	Individual
												HT wk 3	Ep.thick	0.5114	1
												HT wk 3	Ep.thick	0.865	2
												HT wk 3	Lam.per	164.918	1
												HT wk 3	Lam.per	120.48	2
												HT wk 3	Width	6.97766	1
												HT wk 3	Width	6.34804	2
												**Since stats were done with HT wk 3 omitted due to only having 2 individuals, here are the values for each individual for each measurement

## Sheet: Mortality
Apogonid mortality following exercise (none was observed in Fusileras).
Treatment	Sample Size	Mortality	Survival	Mortality
Control	16	1	93.75	6.25
HT wk 0	14	11	21.4286	78.5714
HT wk 1	10	2	80	20
HT wk 2	9	5	44.4444	55.5556
HT wk 3	13	5	61.5385	38.4615
HT wk 4	13	5	61.5385	38.4615
			MEAN	46.21
